# Supplementary material for: Differential Cytokine-Induced Responses of Polarized Microglia
Source: MDPI journal article supplement (doi:10.3390/brainsci11111482), 2021-11-10
Supplement: s1 [file s1]

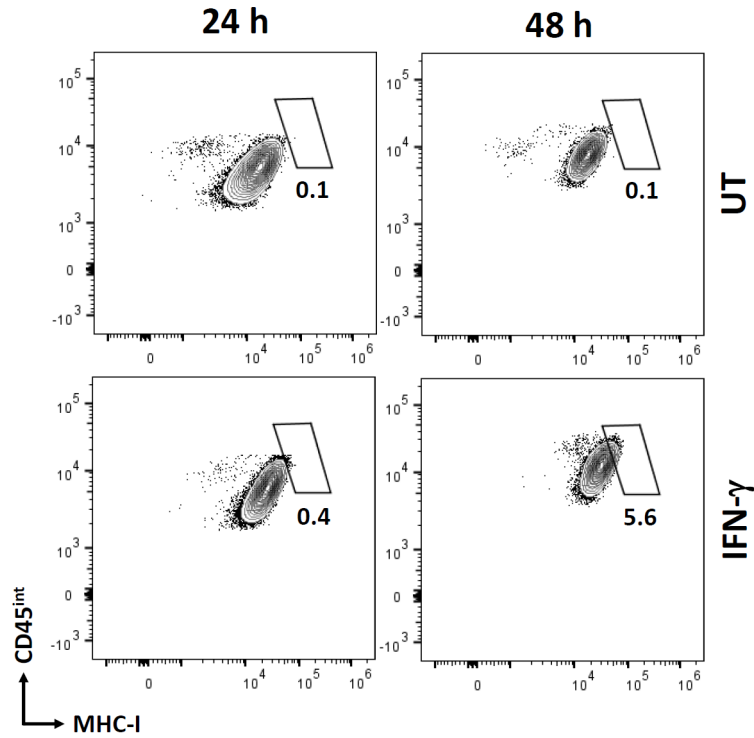

**Figure S1.** MHC-I expression on non-polarized (M0) microglial cells. Microglial cells were treated with IFN- $\gamma$  for 24 h and 48 h after which they were trypsinized and then stained for MHC-I. Representative contour plots showing microglial cells (CD45<sup>int</sup>) expressing MHC-I. UT-untreated control. Experiments were carried out twice with duplicate wells.

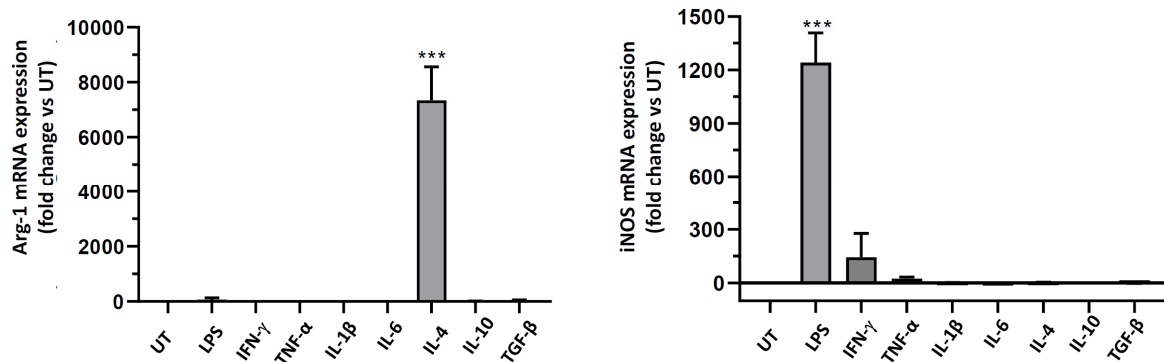

**Figure S2.** Arg-1 and iNOS expression in microglial cells by real time RT-PCR. Microglial cells were cultured and treated with select cytokines as described. cDNA synthesized from 0.5  $\mu$ g -1  $\mu$ g RNA was amplified and fold change of mRNA expression of Arg-1 and iNOS relative to unstimulated control was quantified using the  $2^{-\Delta\Delta C_t}$  method and normalized to the housekeeping gene HPRT. UT-untreated control. Data shown are mean  $\pm$ SE of 3 experiments. \*\*\* $p$ <0.001.
